# Supplementary material
Source: Springer Nature journal article supplement (https://www.springermedizin.de/resource/supplementary/13058_2011_2971_MOESM6_ESM.pdf/9702956)

**A**

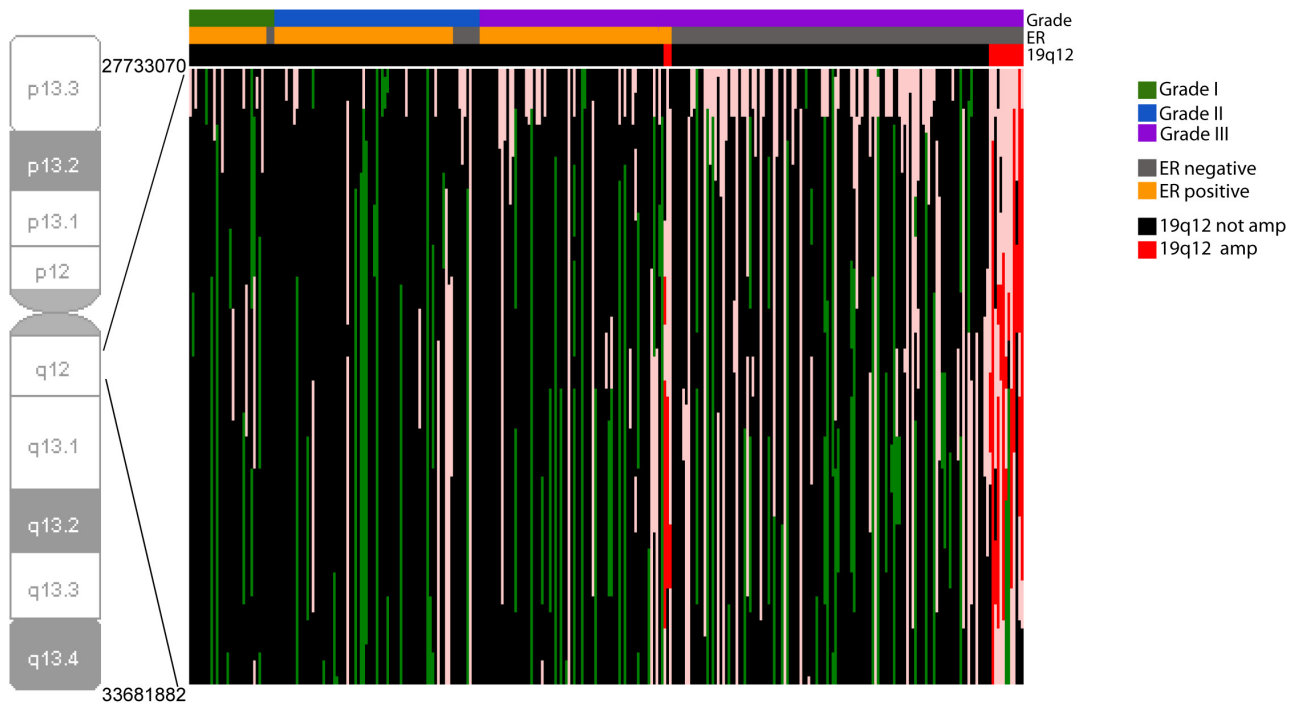

**B**

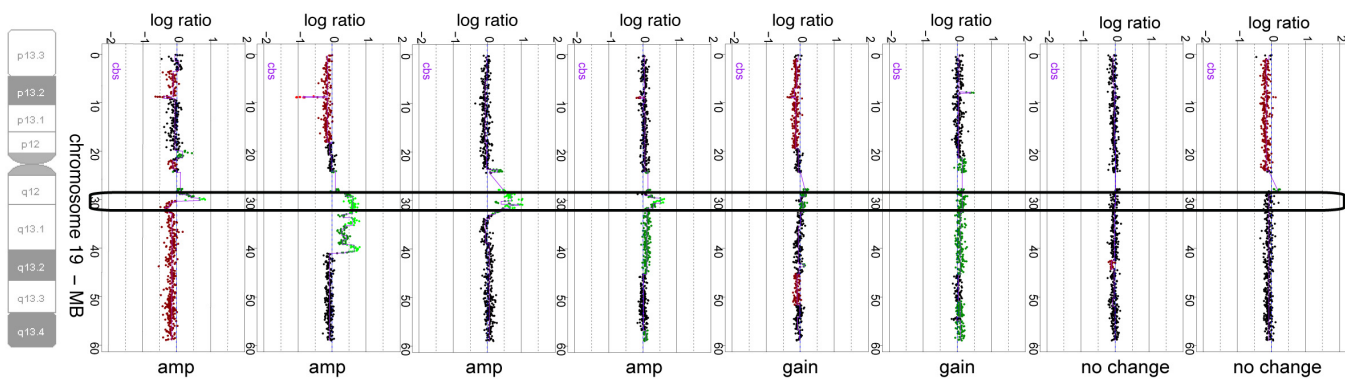

**C**

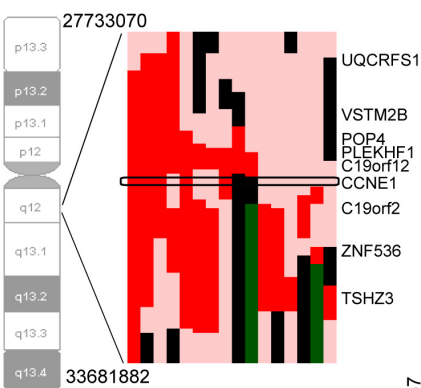

**D**

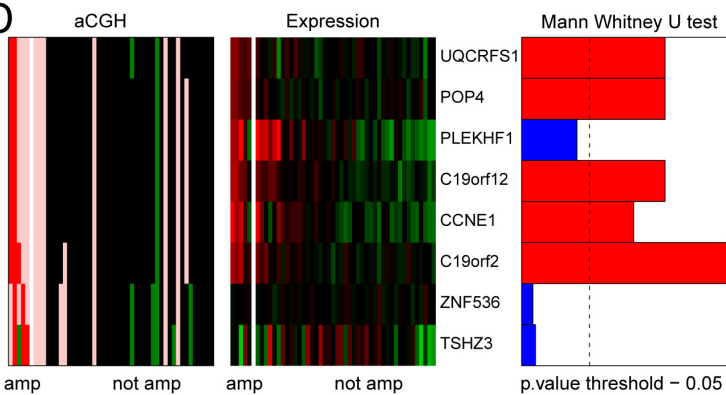

**E**

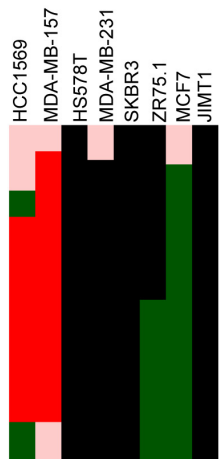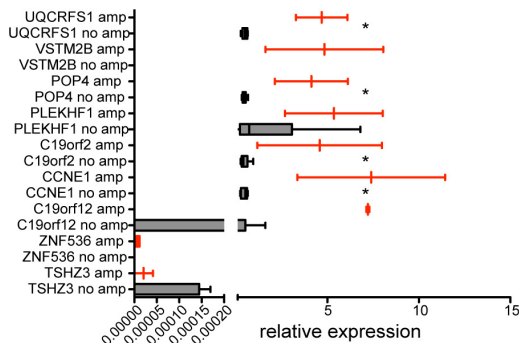

Supplement: MOESM6 [file 9702956]
